# Supplementary material for: Application of Whole Exome Sequencing and Functional Annotations to Identify Genetic Variants Associated with Marfan Syndrome
Source: MDPI journal article supplement (doi:10.3390/jpm12020198), 2022-02-01
Supplement: s1 [file s1]

**Supplementary Table S1. The list of previously reported MFS-related genes.**

| No | Gene Name | Location         | Exons | Description                                              | Reference   |
|----|-----------|------------------|-------|----------------------------------------------------------|-------------|
| 1  | ACE       | <u>17</u> q23.3  | 26    | Angiotensin I Converting Enzyme                          | [1]         |
| 2  | ACTA2     | <u>10</u> q23.31 | 10    | Actin Alpha 2, Smooth Muscle                             | [2, 3]      |
| 3  | AGT       | <u>1</u> q42.2   | 5     | Angiotensinogen                                          | [1]         |
| 4  | COL1A1    | <u>17</u> q21.33 | 51    | Collagen Type I Alpha 1 Chain                            | [2, 4]      |
| 5  | COL1A2    | <u>7</u> q21.3   | 52    | Collagen Type I Alpha 2 Chain                            | [2, 5]      |
| 6  | COL3A1    | <u>2</u> q32.2   | 51    | Collagen Type III Alpha 1 Chain                          | [2]         |
| 7  | COL5A1    | <u>2</u> q34.3   | 67    | Collagen Type V Alpha 1 Chain                            | [2, 4, 6]   |
| 8  | COL5A2    | <u>2</u> q32.2   | 55    | Collagen Type V Alpha 2 Chain                            | [2, 4]      |
| 9  | DSC2      | <u>18</u> q12.1  | 17    | Desmocollin 2                                            | [7]         |
| 10 | FBN1      | <u>15</u> q21.1  | 65    | Fibrillin 1                                              | [2, 3, 7-9] |
| 11 | FBN2      | <u>5</u> q23.3   | 65    | Fibrillin 2                                              | [9]         |
| 12 | FBN3      | <u>19</u> p13.2  | 68    | Fibrillin 3                                              | [10]        |
| 13 | FLNA      | <u>X</u> q28     | 48    | Filamin A                                                | [2, 11]     |
| 14 | LOX       | <u>5</u> q23.1   | 8     | Lysyl Oxidase                                            | [12, 13]    |
| 15 | LOXL1     | <u>15</u> q24.1  | 9     | Lysyl Oxidase Like 1                                     | [12]        |
| 16 | LRP1      | <u>12</u> q13.3  | 90    | LDL Receptor Related Protein 1                           | [7]         |
| 17 | LTBP3     | <u>11</u> q13.1  | 29    | Latent Transforming Growth Factor Beta Binding Protein 3 | [14]        |
| 18 | MTHFR     | <u>1</u> p36.22  | 12    | Methylenetetrahydrofolate Reductase                      | [15]        |
| 19 | MYH11     | <u>16</u> p13.11 | 43    | Myosin Heavy Chain 11                                    | [2, 16]     |
| 20 | MYLK      | <u>3</u> q21.1   | 39    | Myosin Light Chain Kinase                                | [2, 16]     |
| 21 | NOTCH1    | <u>2</u> q34.3   | 34    | Notch Receptor 1                                         | [2]         |
| 22 | SMAD2     | <u>18</u> q21.1  | 18    | SMAD Family Member 2                                     | [17]        |
| 23 | SMAD3     | <u>15</u> q22.33 | 13    | SMAD Family Member 3                                     | [2, 8]      |
| 24 | SMAD4     | <u>18</u> q21.2  | 12    | SMAD Family Member 4                                     | [2, 18]     |
| 25 | TGFBR1    | <u>2</u> q22.33  | 11    | Transforming Growth Factor Beta Receptor 1               | [2, 3, 8]   |
| 26 | TGFBR2    | <u>3</u> p24.1   | 11    | Transforming Growth Factor Beta Receptor 2               | [2, 3, 8]   |

**Supplementary Table S2. Profile of 19 rare variants on MFS-related genes.**

| Chr.      | Position         | Alt.                 | Gene          | Type           | ClinVar Annotation                                                                               |                                                     | Prediction scoring |              |
|-----------|------------------|----------------------|---------------|----------------|--------------------------------------------------------------------------------------------------|-----------------------------------------------------|--------------------|--------------|
|           |                  |                      |               |                | Disease                                                                                          | Significance                                        | CADD               | REVEL        |
| 1         | 11794020         | A                    | MTHFR         | nsSNV          | -                                                                                                | -                                                   | 26.4               | 0.21         |
| 2         | 189051324        | C                    | COL5A2        | nsSNV          | -                                                                                                | -                                                   | 22.8               | 0.368        |
| 3         | 30623240         | C                    | TGFBR2        | nsSNV          | Thoracic aortic aneurysm and aortic dissection                                                   | Likely benign                                       | 6.806              | 0.188        |
| 9         | 99105216         | T                    | TGFBR1        | nsSNV          | -                                                                                                | -                                                   | 24.5               | 0.259        |
| <b>9</b>  | <b>134758250</b> | <b>A</b>             | <b>COL5A1</b> | <b>nsSNV</b>   | <b>Ehlers-Danlos syndrome, classic type</b>                                                      | <b>Conflicting interpretations of pathogenicity</b> | <b>27</b>          | <b>0.674</b> |
| 11        | 65557857         | CCAG<br>CAGC<br>AG,C | LTBP3         | Ins<br>(NF)    | -                                                                                                | -                                                   | -                  | -            |
| 12        | 57167041         | T                    | LRP1          | nsSNV          | -                                                                                                | -                                                   | 24.4               | 0.611        |
| 15        | 48420690         | T                    | FBN1          | nsSNV          | -                                                                                                | Uncertain significance                              | 23.9               | 0.377        |
| <b>15</b> | <b>48436991</b>  | <b>A</b>             | <b>FBN1</b>   | <b>nsSNV</b>   | -                                                                                                | -                                                   | <b>34</b>          | <b>0.941</b> |
| 15        | 48437824         | T                    | FBN1          | nsSNV          | -                                                                                                | -                                                   | 24                 | 0.525        |
| <b>15</b> | <b>48448860</b>  | <b>T</b>             | <b>FBN1</b>   | <b>nsSNV</b>   | <b>Marfan syndrome, Familial thoracic aortic aneurysms and dissections</b>                       | <b>Pathogenic</b>                                   | <b>32</b>          | <b>0.988</b> |
| 15        | 48487321         | G                    | FBN1          | Del (F)        | -                                                                                                | -                                                   | -                  | -            |
| <b>15</b> | <b>48503803</b>  | <b>G</b>             | <b>FBN1</b>   | <b>Del (F)</b> | <b>Marfan syndrome, Loeys-dietz syndrome, Familial thoracic aortic aneurysms and dissections</b> | <b>Likely pathogenic</b>                            | <b>-</b>           | <b>-</b>     |
| <b>16</b> | <b>15714999</b>  | <b>C</b>             | <b>MYH11</b>  | <b>nsSNV</b>   | <b>Aortic aneurysm, familial thoracic 4</b>                                                      | <b>Conflicting interpretations of pathogenicity</b> | <b>10.06</b>       | <b>0.266</b> |
| 17        | 63494011         | T                    | ACE           | nsSNV          | -                                                                                                | -                                                   | 29                 | 0.465        |
| 17        | 63497343         | T                    | ACE           | stop gain      | -                                                                                                | -                                                   | 45                 | -            |
| 19        | 8123973          | T                    | FBN3          | nsSNV          | -                                                                                                | -                                                   | 23.1               | 0.587        |
| 19        | 8133099          | C                    | FBN3          | Del (NF)       | -                                                                                                | -                                                   | -                  | -            |
| <b>19</b> | <b>8136499</b>   | <b>G</b>             | <b>FBN3</b>   | <b>nsSNV</b>   | -                                                                                                | -                                                   | <b>24.5</b>        | <b>0.83</b>  |

Pathogenic variants are shown in bold

**Supplementary Table S3. Systemic score of MFS patients.**

| Feature                                                                                                                      | Patients |   |   |   |   |   |   |   |   |    |  |
|------------------------------------------------------------------------------------------------------------------------------|----------|---|---|---|---|---|---|---|---|----|--|
|                                                                                                                              | 1        | 2 | 3 | 4 | 5 | 6 | 7 | 8 | 9 | 11 |  |
| Wrist and thumb =3 (weist or thumb sign=1)                                                                                   | 1        | 0 | 0 | 1 | 1 | 1 | 0 | 3 | 0 | 1  |  |
| Pectus carinatum deformity = 2 (pectus excavatum or chest asymmetry = 1 )                                                    | 2        | 1 | 0 | 2 | 1 | 0 | 0 | 1 | 0 | 2  |  |
| Hindfoot deformity = 2 (plain pes planus = 1 )                                                                               | 1        | 1 | 0 | 0 | 0 | 1 | 1 | 0 | 1 | 2  |  |
| Dural extasia = 2                                                                                                            | 2        | 0 | 0 | 2 | 0 | 0 | 0 | 0 | 0 | 0  |  |
| Protrusio acetabuli = 2                                                                                                      | 0        | 0 | 0 | 0 | 2 | 0 | 2 | 0 | 0 | 0  |  |
| pneumothroax = 2                                                                                                             | 0        | 0 | 0 | 0 | 0 | 0 | 0 | 0 | 2 | 0  |  |
| Reduced upper segement/lower segment ration and increased arm/height and no severe scoliosis = 1                             | 0        | 0 | 0 | 0 | 0 | 0 | 0 | 0 | 0 | 0  |  |
| Scoliosis or thoracolumbar kyphosis = 1                                                                                      | 1        | 1 | 1 | 0 | 0 | 0 | 1 | 1 | 1 | 1  |  |
| Reduced elbow extension = 1                                                                                                  | 0        | 0 | 0 | 0 | 0 | 0 | 0 | 0 | 0 | 0  |  |
| Mitral valve prolapse = 1                                                                                                    | 1        | 1 | 1 | 0 | 1 | 1 | 0 | 0 | 0 | 0  |  |
| Facial features (3/5) = 1<br>(dolichocephaly, enophthalmos, downslanting palpebral fissures, malar hypoplasia, retrognathia) | 0        | 0 | 0 | 0 | 0 | 0 | 0 | 0 | 0 | 0  |  |
| Skin striae (stretch marks) = 1                                                                                              | 1        | 0 | 1 | 1 | 1 | 0 | 0 | 0 | 0 | 0  |  |
| Myopia > 3 diopters = 1                                                                                                      | 0        | 1 | 1 | 1 | 1 | 1 | 0 | 1 | 0 | 1  |  |
| Systemic score                                                                                                               | 9        | 5 | 4 | 7 | 7 | 4 | 4 | 6 | 4 | 7  |  |

**Supplementary Table S4. MFS candidate genes.**

| <b>Human Associated<br/>Gene Name<br/>(N = 219)</b> | <b>Mouse Associated<br/>Gene Name<br/>(N = 229)</b> | <b>Ensembl gene ID<br/>(N = 230)</b> | <b>Note</b>                        |
|-----------------------------------------------------|-----------------------------------------------------|--------------------------------------|------------------------------------|
| ABCA12                                              | Abca12                                              | ENSMUSG00000050296                   | -                                  |
| ABCC12                                              | Abcc12                                              | ENSMUSG00000036872                   | -                                  |
| ABCC6                                               | Abcc6                                               | ENSMUSG00000030834                   | -                                  |
| ABCC9                                               | Abcc9                                               | ENSMUSG00000030249                   | -                                  |
| ACACB                                               | Acacb                                               | ENSMUSG00000042010                   | -                                  |
| ACE                                                 | Ace                                                 | ENSMUSG00000020681                   | -                                  |
| ADGRG1                                              | Adgrg1                                              | ENSMUSG00000031785                   | -                                  |
| AGL                                                 | Ag1                                                 | ENSMUSG00000033400                   | -                                  |
| AGXT                                                | Agxt                                                | ENSMUSG00000026272                   | -                                  |
| AKAP9                                               | Akap9                                               | ENSMUSG00000040407                   | -                                  |
| ALAS1                                               | Alas1                                               | ENSMUSG00000032786                   | -                                  |
| ALG13                                               | Alg13                                               | ENSMUSG00000041718                   | -                                  |
| ALX1                                                | -                                                   | -                                    | Can't mapped to mouse gene name    |
| ANKRD33B                                            | Ankrd33b                                            | ENSMUSG00000022237                   | -                                  |
| AREL1                                               | Arel1                                               | ENSMUSG00000042350                   | -                                  |
| ARFGAP3                                             | Arfgap3                                             | ENSMUSG00000054277                   | -                                  |
| ASS1                                                | Ass1                                                | ENSMUSG00000076441                   | -                                  |
| ATAD3A                                              | Atad3a                                              | ENSMUSG00000029036                   | -                                  |
| ATL2                                                | Atl2                                                | ENSMUSG00000059811                   | -                                  |
| ATP10B                                              | Atp10b                                              | ENSMUSG00000055415                   | -                                  |
| ATP11B                                              | Atp11b                                              | ENSMUSG00000037400                   | -                                  |
| ATP2B1                                              | Atp2b1                                              | ENSMUSG00000019943                   | -                                  |
| ATP6V0A1                                            | Atp6v0a1                                            | ENSMUSG00000019302                   | -                                  |
| ATP6V1B1                                            | Atp6v1b1                                            | ENSMUSG00000006269                   | -                                  |
| ATP7B                                               | Atp7b                                               | ENSMUSG00000006567                   | -                                  |
| ATXN1                                               | Atxn1                                               | ENSMUSG00000046876                   | -                                  |
| B3GLCT                                              | B3glct                                              | ENSMUSG00000051950                   | -                                  |
| BAG4                                                | Bag4                                                | ENSMUSG00000037316                   | -                                  |
| BARD1                                               | Bard1                                               | ENSMUSG00000026196                   | -                                  |
| BBX                                                 | Bbx                                                 | ENSMUSG00000022641                   | -                                  |
| BCKDHA                                              | Bckdha                                              | ENSMUSG00000060376                   | -                                  |
| BUB1                                                | Bub1                                                | ENSMUSG00000027379                   | -                                  |
| CACNA1C                                             | Cacna1c                                             | ENSMUSG00000051331                   | -                                  |
| CAVIN2                                              | Cavin2                                              | ENSMUSG00000045954                   | -                                  |
| CAVIN4                                              | Cavin4                                              | ENSMUSG00000028348                   | -                                  |
| CDC40                                               | Cdc40                                               | ENSMUSG00000038446                   | -                                  |
| CDH23                                               | Cdh23                                               | ENSMUSG00000012819                   | -                                  |
| CDH4                                                | Cdh4                                                | ENSMUSG00000000305                   | -                                  |
| CELSR3                                              | Celsr3                                              | ENSMUSG00000023473                   | -                                  |
| CEP120                                              | Cep120                                              | ENSMUSG00000048799                   | -                                  |
| CEP290                                              | Cep290                                              | ENSMUSG00000019971                   | -                                  |
| CES2                                                | Ces2b                                               | ENSMUSG00000062826                   | Mapped to multiple mouse gene name |
| CES2                                                | Ces2f                                               | ENSMUSG00000061825                   | Mapped to multiple mouse gene name |
| CES2                                                | Ces2a                                               | ENSMUSG00000055730                   | Mapped to multiple mouse gene name |
| CES2                                                | Ces2e                                               | ENSMUSG00000031877                   | Mapped to multiple mouse gene name |
| CES2                                                | Ces2c                                               | ENSMUSG00000031886                   | Mapped to multiple mouse gene name |
| CES2                                                | Ces2g                                               | ENSMUSG00000050097                   | Mapped to multiple mouse gene name |
| CFAP65                                              | Cfap65                                              | ENSMUSG00000047021                   | -                                  |
| CFD                                                 | Cfd                                                 | ENSMUSG00000061780                   | -                                  |
| CFL2                                                | Cfl2                                                | ENSMUSG00000062929                   | -                                  |
| CHD3                                                | Chd3                                                | ENSMUSG00000018474                   | -                                  |
| CHKB                                                | Gm44502                                             | ENSMUSG00000022617                   | Mapped to multiple mouse gene name |
| CHKB                                                | Chkb                                                | ENSMUSG000000116461                  | Mapped to multiple mouse gene name |
| CHRNA4                                              | Chrna4                                              | ENSMUSG00000027577                   | -                                  |
| CIDEB                                               | Cideb                                               | ENSMUSG00000022219                   | -                                  |
| CNGB3                                               | Cngb3                                               | ENSMUSG00000056494                   | -                                  |

|          |          |                    |                                    |
|----------|----------|--------------------|------------------------------------|
| COL4A3   | Col4a3   | ENSMUSG00000079465 | -                                  |
| COL5A1   | Col5a1   | ENSMUSG00000026837 | -                                  |
| COL5A2   | Col5a2   | ENSMUSG00000026042 | -                                  |
| COL6A3   | Col6a3   | ENSMUSG00000048126 | -                                  |
| COL6A6   | Col6a6   | ENSMUSG00000043719 | -                                  |
| CORIN    | Corin    | ENSMUSG00000005220 | -                                  |
| CPLANE1  | Cplane1  | ENSMUSG00000039801 | -                                  |
| CRISPLD1 | Crispld1 | ENSMUSG00000025776 | -                                  |
| CSK      | Csk      | ENSMUSG00000032312 | -                                  |
| CTSA     | Ctsa     | ENSMUSG00000017760 | -                                  |
| CUBN     | Cubn     | ENSMUSG00000026726 | -                                  |
| CYB5R2   | Cyb5r2   | ENSMUSG00000048065 | -                                  |
| CYP11B1  | -        | -                  | Can't mapped to mouse gene name    |
| CYP2J2   | Cyp2j9   | ENSMUSG00000028571 | Mapped to multiple mouse gene name |
| CYP2J2   | Cyp2j13  | ENSMUSG00000015224 | Mapped to multiple mouse gene name |
| CYP4F3   | Cyp4f18  | ENSMUSG00000003484 | -                                  |
| DDOST    | Ddost    | ENSMUSG00000028757 | -                                  |
| DHCR24   | Dhcr24   | ENSMUSG00000034926 | -                                  |
| DNAH7    | Dnah7a   | ENSMUSG00000096141 | Mapped to multiple mouse gene name |
| DNAH7    | Dnah7c   | ENSMUSG00000101337 | Mapped to multiple mouse gene name |
| DNAH7    | Dnah7b   | ENSMUSG00000041144 | Mapped to multiple mouse gene name |
| DNAH8    | Dnah8    | ENSMUSG00000033826 | -                                  |
| DSG2     | -        | -                  | Can't mapped to mouse gene name    |
| EARS2    | Ears2    | ENSMUSG00000030871 | -                                  |
| EBAG9    | Ebag9    | ENSMUSG00000022339 | -                                  |
| EIPR1    | Eipr1    | ENSMUSG00000036613 | -                                  |
| EP400    | Ep400    | ENSMUSG00000029505 | -                                  |
| EPC2     | Epc2     | ENSMUSG00000069495 | -                                  |
| ESPNL    | Espnl    | ENSMUSG00000049515 | -                                  |
| ESRRG    | Esrrg    | ENSMUSG00000026610 | -                                  |
| EXOC5    | Exoc5    | ENSMUSG00000061244 | -                                  |
| FAM126A  | Fam126a  | ENSMUSG00000028995 | -                                  |
| FAS      | Fas      | ENSMUSG00000024778 | -                                  |
| FAT1     | Fat1     | ENSMUSG00000070047 | -                                  |
| FBN1     | Fbn1     | ENSMUSG00000027204 | -                                  |
| FBN3     | -        | -                  | Can't mapped to mouse gene name    |
| FBXO16   | Fbxo16   | ENSMUSG00000034532 | -                                  |
| FLG      | Flg      | ENSMUSG00000102439 | -                                  |
| FLNC     | Flnc     | ENSMUSG00000068699 | -                                  |
| FMO3     | Fmo3     | ENSMUSG00000026691 | -                                  |
| FRY      | Fry      | ENSMUSG00000056602 | -                                  |
| GARNL3   | Garnl3   | ENSMUSG00000038860 | -                                  |
| GC       | Gc       | ENSMUSG00000035540 | -                                  |
| GFM1     | Gfm1     | ENSMUSG00000027774 | -                                  |
| GIPC2    | Gipc2    | ENSMUSG00000039131 | -                                  |
| GLRA1    | Glr1     | ENSMUSG00000000263 | -                                  |
| GPD2     | Gpd2     | ENSMUSG00000026827 | -                                  |
| GPRC5C   | Gprc5c   | ENSMUSG00000051043 | -                                  |
| GRK7     | -        | -                  | Can't mapped to mouse gene name    |
| GSS      | Gss      | ENSMUSG00000027610 | -                                  |
| HABP2    | Habp2    | ENSMUSG00000025075 | -                                  |
| HCFC1    | Hcfc1    | ENSMUSG00000031386 | -                                  |
| HGSNAT   | Hgsnat   | ENSMUSG00000037260 | -                                  |
| IL17RD   | Il17rd   | ENSMUSG00000040717 | -                                  |
| ITGA6    | Itga6    | ENSMUSG00000027111 | -                                  |
| KATNAL1  | Katnal1  | ENSMUSG00000041298 | -                                  |
| KDM5B    | Kdm5b    | ENSMUSG00000042207 | -                                  |
| KIF9     | Kif9     | ENSMUSG00000032489 | -                                  |
| KLHL40   | Klhl40   | ENSMUSG00000074001 | -                                  |
| KRT82    | Krt82    | ENSMUSG00000049548 | -                                  |
| L2HGDH   | L2hgdh   | ENSMUSG00000020988 | -                                  |

|        |         |                     |                                    |
|--------|---------|---------------------|------------------------------------|
| LAMA3  | Lama3   | ENSMUSG00000024421  | -                                  |
| LAMC3  | Lamc3   | ENSMUSG00000026840  | -                                  |
| LDB3   | Ldb3    | ENSMUSG000000021798 | -                                  |
| LDLR   | Ldlr    | ENSMUSG000000032193 | -                                  |
| LIMA1  | Lima1   | ENSMUSG000000023022 | -                                  |
| LPIN1  | Lpin1   | ENSMUSG000000020593 | -                                  |
| LRCH4  | Lrch4   | ENSMUSG000000029720 | Mapped to multiple mouse gene name |
| LRCH4  | Gm20605 | ENSMUSG000000093445 | Mapped to multiple mouse gene name |
| LRP1   | Lrp1    | ENSMUSG000000040249 | -                                  |
| LRP1B  | Lrp1b   | ENSMUSG000000049252 | -                                  |
| LRP4   | Lrp4    | ENSMUSG000000027253 | -                                  |
| LTBP3  | Ltbp3   | ENSMUSG000000024940 | -                                  |
| LTK    | Ltk     | ENSMUSG000000027297 | -                                  |
| MAT2A  | Mat2a   | ENSMUSG000000053907 | -                                  |
| MATN4  | Matn4   | ENSMUSG000000016995 | -                                  |
| MCCC2  | Mccc2   | ENSMUSG000000021646 | -                                  |
| ME2    | Me2     | ENSMUSG000000024556 | -                                  |
| MEGF10 | Megf10  | ENSMUSG000000024593 | -                                  |
| MFN1   | Mfn1    | ENSMUSG000000027668 | -                                  |
| MPI    | Mpi     | ENSMUSG000000032306 | -                                  |
| MSH2   | Msh2    | ENSMUSG000000024151 | -                                  |
| MTHFR  | Mthfr   | ENSMUSG000000029009 | -                                  |
| MUSK   | Musk    | ENSMUSG000000057280 | -                                  |
| MYBPC3 | Mybpc3  | ENSMUSG000000002100 | -                                  |
| MYH11  | Myh11   | ENSMUSG000000018830 | -                                  |
| MYH8   | Myh8    | ENSMUSG000000055775 | -                                  |
| MYO1H  | Myo1h   | ENSMUSG000000066952 | -                                  |
| MYO5C  | Myo5c   | ENSMUSG000000033590 | -                                  |
| MYO9A  | Myo9a   | ENSMUSG000000039585 | -                                  |
| MYOT   | Myot    | ENSMUSG000000024471 | -                                  |
| NAPA   | Napa    | ENSMUSG000000006024 | -                                  |
| NCF1   | Ncf1    | ENSMUSG000000015950 | -                                  |
| NEK3   | Nek3    | ENSMUSG000000031478 | -                                  |
| NELL2  | Nell2   | ENSMUSG000000022454 | -                                  |
| NHLRC1 | Nhlrc1  | ENSMUSG000000044231 | -                                  |
| NOTCH3 | Notch3  | ENSMUSG000000038146 | -                                  |
| NPC1   | Npc1    | ENSMUSG000000024413 | -                                  |
| NPL    | Npl     | ENSMUSG000000042684 | -                                  |
| NR0B2  | Nr0b2   | ENSMUSG000000037583 | -                                  |
| NRCAM  | Nrcam   | ENSMUSG000000020598 | -                                  |
| NRXN1  | Nrxn1   | ENSMUSG000000024109 | -                                  |
| OPA1   | Opa1    | ENSMUSG000000038084 | -                                  |
| OTOF   | Otof    | ENSMUSG000000062372 | -                                  |
| PANK2  | Pank2   | ENSMUSG000000037514 | -                                  |
| PAQR6  | Paqr6   | ENSMUSG000000041423 | -                                  |
| PAX6   | Pax6    | ENSMUSG000000027168 | -                                  |
| PCCA   | Pcca    | ENSMUSG000000041650 | -                                  |
| PCSK9  | Pcsk9   | ENSMUSG000000044254 | -                                  |
| PDE6A  | Pde6a   | ENSMUSG000000024575 | -                                  |
| PGC    | Pgc     | ENSMUSG000000023987 | -                                  |
| PICK1  | Pick1   | ENSMUSG000000068206 | Mapped to multiple mouse gene name |
| PICK1  | Gm49486 | ENSMUSG000000116121 | Mapped to multiple mouse gene name |
| PIGW   | Pigw    | ENSMUSG000000045140 | -                                  |
| PKHD1  | Pkhd1   | ENSMUSG000000043760 | -                                  |
| PKP2   | Pkp2    | ENSMUSG000000041957 | -                                  |
| PLAT   | Plat    | ENSMUSG000000031538 | -                                  |
| PLCB2  | Plcb2   | ENSMUSG000000040061 | -                                  |
| PNPLA7 | Pnpla7  | ENSMUSG000000036833 | -                                  |
| PNPLA8 | Pnpla8  | ENSMUSG000000036257 | -                                  |
| POLG   | Polg    | ENSMUSG000000039176 | -                                  |
| POMT1  | Pomt1   | ENSMUSG000000039254 | -                                  |

|           |           |                     |                                    |
|-----------|-----------|---------------------|------------------------------------|
| POU4F3    | Pou4f3    | ENSMUSG00000024497  | -                                  |
| PPTC7     | Pptc7     | ENSMUSG00000038582  | -                                  |
| PRKCSH    | Prkcsh    | ENSMUSG00000003402  | -                                  |
| PRKRA     | Prkra     | ENSMUSG00000002731  | -                                  |
| PRSS1     | Prss2     | ENSMUSG00000071521  | Mapped to multiple mouse gene name |
| PRSS1     | Gm10334   | ENSMUSG00000036938  | Mapped to multiple mouse gene name |
| PRSS1     | Prss3     | ENSMUSG00000054106  | Mapped to multiple mouse gene name |
| PRSS1     | Prss1     | ENSMUSG00000071517  | Mapped to multiple mouse gene name |
| PRSS1     | Gm5771    | ENSMUSG00000071519  | Mapped to multiple mouse gene name |
| PRSS1     | Try4      | ENSMUSG00000058119  | Mapped to multiple mouse gene name |
| PRSS1     | Try10     | ENSMUSG00000062751  | Mapped to multiple mouse gene name |
| PRSS1     | Try5      | ENSMUSG00000057163  | Mapped to multiple mouse gene name |
| PTEN      | Pten      | ENSMUSG00000013663  | -                                  |
| PTPRR     | Ptprr     | ENSMUSG00000020151  | -                                  |
| RAB3GAP2  | Rab3gap2  | ENSMUSG00000039318  | -                                  |
| RBM20     | Rbm20     | ENSMUSG00000043639  | -                                  |
| RNF175    | -         | -                   | Can't mapped to mouse gene name    |
| RPS6KA6   | Rps6ka6   | ENSMUSG00000025665  | -                                  |
| SACM1L    | Sacm1l    | ENSMUSG00000025240  | -                                  |
| SARDH     | Sardh     | ENSMUSG00000009614  | -                                  |
| SCN4B     | Scn4b     | ENSMUSG00000046480  | -                                  |
| SDHA      | Sdha      | ENSMUSG00000021577  | -                                  |
| SECISBP2L | Secisbp2l | ENSMUSG00000035093  | -                                  |
| SHPRH     | Shprh     | ENSMUSG00000090112  | -                                  |
| SLC16A1   | Slc16a1   | ENSMUSG00000032902  | -                                  |
| SLC16A14  | Slc16a14  | ENSMUSG00000026220  | -                                  |
| SLC22A1   | Slc22a1   | ENSMUSG00000023829  | -                                  |
| SLC22A4   | Slc22a4   | ENSMUSG00000020334  | -                                  |
| SLC25A5   | Slc25a5   | ENSMUSG00000016319  | -                                  |
| SLC35G6   | Slc35g3   | ENSMUSG00000018776  | -                                  |
| SMCHD1    | Smchd1    | ENSMUSG00000024054  | -                                  |
| SMOX      | Smox      | ENSMUSG00000027333  | -                                  |
| SNX27     | Snx27     | ENSMUSG00000028136  | -                                  |
| SOD3      | Sod3      | ENSMUSG00000072941  | -                                  |
| SOX10     | Sox10     | ENSMUSG00000033006  | -                                  |
| SPATA5    | Spata5    | ENSMUSG00000027722  | -                                  |
| SPATA7    | Spata7    | ENSMUSG00000021007  | -                                  |
| SPINT1    | Spint1    | ENSMUSG00000027315  | -                                  |
| SSBP2     | Ssbp2     | ENSMUSG00000003992  | -                                  |
| STX10     | -         | -                   | Can't mapped to mouse gene name    |
| TBX3      | Tbx3      | ENSMUSG00000018604  | -                                  |
| TCTN2     | -         | ENSMUSG000000118662 | Can't mapped to mouse gene name    |
| TGFBR1    | Tgfbr1    | ENSMUSG00000007613  | -                                  |
| TGFBR2    | Tgfbr2    | ENSMUSG00000032440  | -                                  |
| TMEM82    | Tmem82    | ENSMUSG00000043085  | -                                  |
| TRIM17    | Trim17    | ENSMUSG00000036964  | -                                  |
| TRIP13    | Trip13    | ENSMUSG00000021569  | -                                  |
| TRRAP     | Trrap     | ENSMUSG00000045482  | -                                  |
| TTI2      | Tti2      | ENSMUSG00000031577  | -                                  |
| TTN       | Ttn       | ENSMUSG00000051747  | -                                  |
| TYRP1     | Tyrp1     | ENSMUSG00000005994  | -                                  |
| UNC13C    | Unc13c    | ENSMUSG00000062151  | -                                  |
| UNC13D    | Unc13d    | ENSMUSG00000057948  | -                                  |
| USH2A     | Ush2a     | ENSMUSG00000026609  | -                                  |
| VWF       | Vwf       | ENSMUSG00000001930  | -                                  |
| WDR11     | Wdr11     | ENSMUSG00000042055  | -                                  |
| WHRN      | Whrn      | ENSMUSG00000039137  | -                                  |
| ZNF469    | Zfp469    | ENSMUSG00000043903  | -                                  |
| ZRANB3    | Zranb3    | ENSMUSG00000036086  | -                                  |

**Supplementary Table S5. Rare variants on MFS candidate genes carried by patients no.2.**

| Chr. | Position  | Alt. | Gene    | Type  | TWB    | Number of Alt. allele in MFS patients |   |   |   |   |   |   |   |   |    |                 |
|------|-----------|------|---------|-------|--------|---------------------------------------|---|---|---|---|---|---|---|---|----|-----------------|
|      |           |      |         |       |        | 1                                     | 2 | 3 | 4 | 5 | 6 | 7 | 8 | 9 | 11 | 10 <sup>a</sup> |
| 2    | 178573830 | T    | TTN     | nsSNV | 0.0035 | -                                     | 1 | - | - | - | - | - | - | - | -  | -               |
| 2    | 240869010 | C    | AGXT    | nsSNV | 0.01   | -                                     | 1 | - | - | - | - | - | - | - | -  | -               |
| 2    | 11815153  | G    | LPIN1   | nsSNV | -      | -                                     | 1 | - | - | - | - | - | - | - | -  | -               |
| 3    | 57106133  | A    | IL17RD  | nsSNV | 0.002  | -                                     | 1 | - | - | - | - | - | - | - | -  | -               |
| 5    | 132335857 | C    | SLC22A4 | nsSNV | 0.002  | -                                     | 1 | - | - | - | - | - | - | - | -  | -               |
| 5    | 146339918 | G    | POU4F3  | nsSNV | 0.0005 | -                                     | 1 | - | - | - | - | - | - | - | -  | -               |
| 6    | 18121516  | A    | NHLRC1  | nsSNV | 0.0035 | -                                     | 1 | - | - | - | - | - | - | - | -  | -               |
| 7    | 92110149  | C    | AKAP9   | nsSNV | 0.007  | -                                     | 1 | - | - | - | - | - | - | - | -  | -               |
| 7    | 142752950 | G    | PRSS1   | nsSNV | -      | 1                                     | 1 | 1 | - | - | 1 | - | 1 | - | 1  | -               |
| 7    | 108191788 | A    | NRCAM   | nsSNV | -      | -                                     | 1 | - | - | - | - | - | - | - | -  | -               |
| 7    | 142750621 | G    | PRSS1   | nsSNV | 0.004  | -                                     | 1 | - | - | - | - | - | - | - | -  | -               |
| 8    | 33500476  | C    | TTI2    | nsSNV | 0.008  | -                                     | 1 | - | - | - | - | - | - | - | -  | -               |
| 8    | 42180344  | C    | PLAT    | nsSNV | 0.005  | -                                     | 1 | - | - | - | - | - | - | - | -  | -               |
| 9    | 127335269 | T    | GARNL3  | nsSNV | -      | -                                     | 1 | - | - | - | - | - | - | - | -  | -               |
| 10   | 110812415 | A    | RBM20   | nsSNV | 0.0015 | -                                     | 1 | - | - | - | - | - | - | - | -  | -               |
| 12   | 32843271  | A    | PKP2    | nsSNV | 0.002  | -                                     | 1 | - | - | - | - | - | - | - | -  | -               |
| 16   | 23552164  | C    | EARS2   | nsSNV | 0.0035 | -                                     | 1 | - | - | - | - | - | - | - | -  | -               |
| 16   | 48105194  | G    | ABCC12  | nsSNV | 0.0005 | -                                     | 1 | - | - | - | - | - | - | - | -  | -               |
| 17   | 10406098  | C    | MYH8    | nsSNV | -      | -                                     | 1 | - | - | - | - | - | - | - | -  | -               |
| 17   | 74440560  | C    | GPRC5C  | nsSNV | 0.0005 | -                                     | 1 | - | - | - | - | - | - | - | -  | -               |
| 20   | 3889380   | G    | PANK2   | nsSNV | 0.01   | -                                     | 1 | - | - | - | - | - | - | - | -  | -               |
| 20   | 61936812  | A    | CDH4    | nsSNV | 0.001  | -                                     | 1 | - | - | - | - | - | - | - | -  | -               |
| 22   | 42847628  | A    | ARFGAP3 | nsSNV | -      | -                                     | 1 | - | - | - | - | - | - | - | -  | -               |

<sup>a</sup>Healthy subject.



**Supplementary Table S6. Rare variants on MFS candidate genes carried by patients no.5.**

| Chr. | Position  | Alt. | Gene    | Type     | TWB    | Number of Alt. allele in MFS patients |   |   |   |   |   |   |   |   |    |                 |  |
|------|-----------|------|---------|----------|--------|---------------------------------------|---|---|---|---|---|---|---|---|----|-----------------|--|
|      |           |      |         |          |        | 1                                     | 2 | 3 | 4 | 5 | 6 | 7 | 8 | 9 | 11 | 10 <sup>a</sup> |  |
| 1    | 171108182 | C    | FMO3    | stopgain | -      | -                                     | - | - | - | 1 | - | - | - | - | -  | -               |  |
| 2    | 47429786  | G    | MSH2    | nsSNV    | 0.0015 | -                                     | - | - | - | 1 | - | - | - | - | -  | -               |  |
| 2    | 214951036 | C    | ABCA12  | nsSNV    | 0.003  | -                                     | - | - | - | 1 | - | - | - | - | -  | -               |  |
| 3    | 141807906 | T    | GRK7    | nsSNV    | 0.003  | -                                     | - | - | - | 1 | - | - | - | - | -  | -               |  |
| 3    | 193642978 | A    | OPA1    | nsSNV    | -      | -                                     | - | - | - | 1 | - | - | - | - | -  | -               |  |
| 4    | 186663613 | A    | FAT1    | nsSNV    | -      | -                                     | - | - | - | 1 | - | - | - | - | -  | -               |  |
| 5    | 893075    | G    | TRIP13  | nsSNV    | 0.001  | -                                     | - | - | - | 1 | - | - | - | - | -  | -               |  |
| 5    | 236504    | C    | SDHA    | nsSNV    | -      | -                                     | - | - | - | 1 | - | - | - | - | -  | -               |  |
| 5    | 151859872 | C    | GLRA1   | nsSNV    | -      | -                                     | - | - | - | 1 | - | - | - | - | -  | -               |  |
| 7    | 74779296  | A    | NCF1    | nsSNV    | 0.002  | -                                     | - | - | - | 1 | - | - | - | - | -  | -               |  |
| 8    | 43173733  | C    | HGSNAT  | nsSNV    | -      | -                                     | - | - | - | 1 | - | - | - | - | -  | -               |  |
| 9    | 100578538 | A    | CAVIN4  | nsSNV    | 0.002  | -                                     | - | - | - | 1 | - | - | - | - | -  | -               |  |
| 12   | 21829038  | A    | ABCC9   | nsSNV    | 0.004  | -                                     | - | - | - | 1 | - | - | - | - | -  | -               |  |
| 13   | 30210320  | T    | KATNAL1 | nsSNV    | 0.0035 | -                                     | - | - | - | 1 | - | - | - | - | -  | -               |  |
| 15   | 74896235  | G    | MPI     | nsSNV    | 0.001  | -                                     | - | - | - | 1 | - | - | - | - | -  | -               |  |
| 15   | 89320917  | T    | POLG    | nsSNV    | 0.002  | -                                     | - | - | - | 1 | - | - | - | - | -  | -               |  |
| 17   | 7482918   | A    | SLC35G6 | nsSNV    | 0.005  | -                                     | - | - | - | 1 | - | - | - | - | -  | -               |  |
| 17   | 36537558  | T    | PIGW    | nsSNV    | 0.0005 | -                                     | - | - | - | 1 | - | - | - | - | -  | -               |  |
| 18   | 50920565  | A    | ME2     | nsSNV    | -      | -                                     | - | - | 1 | 1 | 1 | - | - | - | -  | -               |  |
| 20   | 34942942  | T    | GSS     | nsSNV    | -      | -                                     | - | - | - | 1 | - | - | - | - | -  | -               |  |
| 22   | 37983654  | C    | SOX10   | nsSNV    | 0.003  | -                                     | - | - | - | 1 | - | - | - | - | -  | -               |  |

<sup>a</sup>Healthy subject.

1. Fatini C, Attanasio M, Porciani C, Sticchi E, Padeletti L, Lapini I, Abbate R, Gensini GF, and Pepe G, *AGT and ACE genes influence classic mitral valve prolapse predisposition in Marfan patients*. Int J Cardiol, 2008. **123**(3): p. 293-7.
2. Gentilini D, Oliveri A, Fazia T, Pini A, Marelli S, Bernardinelli L, and Di Blasio AM, *NGS analysis in Marfan syndrome spectrum: Combination of rare and common genetic variants to improve genotype-phenotype correlation analysis*. PLoS One, 2019. **14**(9): p. e0222506.
3. Lerner-Ellis JP, Aldubayan SH, Hernandez AL, Kelly MA, Stuenkel AJ, Walsh J, and Joshi VA, *The spectrum of FBN1, TGFβR1, TGFβR2 and ACTA2 variants in 594 individuals with suspected Marfan Syndrome, Loeys-Dietz Syndrome or Thoracic Aortic Aneurysms and Dissections (TAAD)*. Mol Genet Metab, 2014. **112**(2): p. 171-6.
4. Ritelli M, Dordoni C, Venturini M, Chiarelli N, Quinzani S, et al., *Clinical and molecular characterization of 40 patients with classic Ehlers-Danlos syndrome: identification of 18 COL5A1 and 2 COL5A2 novel mutations*. Orphanet J Rare Dis, 2013. **8**: p. 58.
5. Gan Q, Liu Q, Hu X, and You C, *Collagen Type I Alpha 2 (COL1A2) Polymorphism Contributes to Intracranial Aneurysm Susceptibility: A Meta-Analysis*. Med Sci Monit, 2017. **23**: p. 3240-3246.
6. Wenstrup RJ, Florer JB, Willing MC, Giunta C, Steinmann B, Young F, Susic M, and Cole WG, *COL5A1 haploinsufficiency is a common molecular mechanism underlying the classical form of EDS*. Am J Hum Genet, 2000. **66**(6): p. 1766-76.
7. Li G, Yu J, Wang K, Wang B, Wang M, Zhang S, Qin S, and Yu Z, *Exome sequencing identified new mutations in a Marfan syndrome family*. Diagn Pathol, 2014. **9**: p. 25.
8. Li J, Lu C, Wu W, Liu Y, Wang R, Si N, Meng X, Zhang S, and Zhang X, *Application of next-generation sequencing to screen for pathogenic mutations in 123 unrelated Chinese patients with Marfan syndrome or a related disease*. Sci China Life Sci, 2019. **62**(12): p. 1630-1637.
9. Tsipouras P, Del Mastro R, Sarfarazi M, Lee B, Vitale E, et al., *Genetic linkage of the Marfan syndrome, ectopia lentis, and congenital contractural arachnodactyly to the fibrillin genes on chromosomes 15 and 5. The International Marfan Syndrome Collaborative Study*. N Engl J Med, 1992. **326**(14): p. 905-9.
10. Uyeda T, Takahashi T, Eto S, Sato T, Xu G, Kanezaki R, Toki T, Yonesaka S, and Ito E, *Three novel mutations of the fibrillin-1 gene and ten single nucleotide polymorphisms of the fibrillin-3 gene in Marfan syndrome patients*. J Hum Genet, 2004. **49**(8): p. 404-407.
11. Meester JA, Vandeweyer G, Pintelon I, Lammens M, Van Hoorick L, et al., *Loss-of-function mutations in the X-linked biglycan gene cause a severe syndromic form of thoracic aortic aneurysms and dissections*. Genet Med, 2017. **19**(4): p. 386-395.
12. Busnadiego O, Gorbenko Del Blanco D, González-Santamaría J, Habashi JP, Calderon JF, et al., *Elevated expression levels of lysyl oxidases protect against aortic aneurysm progression in Marfan syndrome*. J Mol Cell Cardiol, 2015. **85**: p. 48-57.
13. Loeys BL, Mortier G, and Dietz HC, *Bone lessons from Marfan syndrome and related disorders: fibrillin, TGF-β and BMP at the balance of too long and too short*. Pediatr Endocrinol Rev, 2013. **10 Suppl 2**: p. 417-23.
14. Morlino S, Alesi V, Cali F, Lepri FR, Secinaro A, et al., *LTBP2-related "Marfan-like" phenotype in two Roma/Gypsy subjects with the LTBP2 homozygous p.R299X variant*. Am J Med Genet A, 2019. **179**(1): p. 104-112.
15. Giusti B, Porciani MC, Brunelli T, Evangelisti L, Fedi S, et al., *Phenotypic variability of cardiovascular manifestations in Marfan Syndrome. Possible role of*

- hyperhomocysteinemia and C677T MTHFR gene polymorphism*. Eur Heart J, 2003. **24**(22): p. 2038-45.
16. Takeda N and Komuro I, *Genetic basis of hereditary thoracic aortic aneurysms and dissections*. J Cardiol, 2019. **74**(2): p. 136-143.
  17. Cannaerts E, Kempers M, Maugeri A, Marcelis C, Gardeitchik T, et al., *Novel pathogenic SMAD2 variants in five families with arterial aneurysm and dissection: further delineation of the phenotype*. J Med Genet, 2019. **56**(4): p. 220-227.
  18. Holm TM, Habashi JP, Doyle JJ, Bedja D, Chen Y, et al., *Noncanonical TGF $\beta$  signaling contributes to aortic aneurysm progression in Marfan syndrome mice*. Science, 2011. **332**(6027): p. 358-61.
